# Supplementary material for: Is Chimpanzee (Pan troglodytes) Wounding Frequency Affected by the Presence Versus Absence of Visitors? A Multi-Institutional Study
Source: MDPI journal article supplement (doi:10.3390/jzbg3030025), 2022-07-01
Supplement: s1 [file s1]

Archive with 3 entries (3 files):
- Date Parameters.pdf
- Google Form Survey.pdf
- Selection Process Table.pdf
