# Supplementary material for: Is Chimpanzee (Pan troglodytes) Wounding Frequency Affected by the Presence Versus Absence of Visitors? A Multi-Institutional Study
Source: MDPI journal article supplement (doi:10.3390/jzbg3030025), 2022-07-01
Supplement: s1 [file s1]

S2: Decision Table for Zoo Inclusion

| Confounding Variables                | Zoos |   |   |   |   |   |   |   |   |   |   |   |   |   |   |   |   |   |   |
|--------------------------------------|------|---|---|---|---|---|---|---|---|---|---|---|---|---|---|---|---|---|---|
|                                      | A    | B | C | D | E | F | G | H | I | J | K | L | M | N | O | P | Q | R | S |
| Did Not Record Wounds                |      |   |   |   |   |   |   |   |   | X |   |   |   |   |   |   |   |   |   |
| Change In Wound Recording Criteria   |      |   |   |   |   |   |   |   |   |   |   |   | X |   |   |   |   |   |   |
| Change In Group Composition          |      |   |   |   |   | X |   | X |   | X |   | X | X | X | X | X | X | X | X |
| Change In Primary Keepers            |      |   |   |   |   |   | X |   | X |   |   |   |   |   |   |   |   |   | X |
| Change In Main Features Of Enclosure |      |   |   |   |   |   |   |   |   |   |   | X |   |   |   |   |   |   |   |
| New Animals Added Near Enclosure     | X    |   |   |   |   |   |   |   | X |   |   |   |   |   |   |   |   |   | X |
| Change In PPE                        | X    | X | X | X | X | X | X | X | X |   | X | X | X |   |   | X | X | X | X |
| Reduced PRT                          |      |   | X | X |   |   |   | X | X |   |   |   |   |   |   |   | X | X | X |
| Suspended PRT                        |      |   |   |   | X |   | X |   |   | X | X |   | X |   |   |   |   |   |   |

In order to ensure anonymity, each zoo was assigned a letter and each chimpanzee was assigned a number. The chart reflects the 19 zoos that responded to the survey at the top, signified by letters A-S. On the y-axis are the confounding variables that either resulted in immediate removal from the selection pool, or warranted additional consideration. Zoos A-C were eligible and participated in the study (green shading). Zoo D (yellow shading) was eligible, but did not participate in the study.

The four eligible zoos reported only minor changes during the study period, namely regarding increased use of Personal Protective Equipment (PPE). However, because chimpanzees are intelligent enough to identify their caretakers despite facial coverings, this was not considered detrimental to the study. Zoo A reported that new birds had been added to nearby enclosures; however, this had been ongoing for some

time, and only the individual birds were new (not species proximity). Zoos C and D reported a change in PPE use as well as a reduction in positive reinforcement training (PRT) due to contagion concerns.

The red shading shows the reasons for ineligibility for the remaining 15 zoos. Some were found ineligible due to multiple confounding variables, as reflected in the table.
