# Supplementary material for: Is Chimpanzee (Pan troglodytes) Wounding Frequency Affected by the Presence Versus Absence of Visitors? A Multi-Institutional Study
Source: MDPI journal article supplement (doi:10.3390/jzbg3030025), 2022-07-01
Supplement: s1 [file s1]

# Pre-Study Survey for: A Comparison of Chimpanzee Wound Rates Before and During COVID-19 Zoo Closures

---

\* Required

1. Email \*

---

2. What is your first and last name? \*

---

3. What is the name of your zoo? \*

---

4. Do you record all visible chimpanzee wounds? Note: Wounds are defined as scratches, abrasions, lacerations, broken bones, limping, not using or “favoring” a body part, or indicating in some manner that a particular body part is injured. \*

*Mark only one oval.*

☐ yes

☐ No

☐ Other: 

---

5. What are your criteria and procedures for recording chimpanzee wounds? \*

---

---

---

---

---

6. Did your criteria or procedures for recording chimpanzee wounds change between March 2019 and July 2020? \*

*Mark only one oval.*

☐ Yes

☐ No

7. If your criteria or procedures for recording chimpanzee wounds changed between March 2019 and July 2020, please describe when and to what extent.

---

---

---

---

---

8. What record-keeping system do you use to record wounds, and how is this information retrieved? \*

---

---

---

---

---

9. Did the group composition of chimpanzees change at your zoo between March 2019 and July 2020? \*

*Mark only one oval.*

☐ Yes

☐ No

10. If the group composition of chimpanzees changed at your zoo between March 2019 and July 2020, please describe when and to what extent.

---

---

---

---

---

11. How many chimpanzees did you have at your zoo in March – July 2019? \*

---

12. How many chimpanzees did you have at your zoo in March – July 2020? \*

---

13. Did the primary keepers/caregivers change for the chimpanzees at your zoo between March 2019 and July 2020? \*

*Mark only one oval.*

☐ Yes

☐ No

14. If the primary keepers/caregivers changed for the chimpanzees at your zoo between March 2019 and July 2020, please describe when and to what extent.

---

---

---

---

---

15. Did the main features of the enclosure(s) change for the chimpanzees at your zoo between March 2019 and July 2020? \*

*Mark only one oval.*

☐ Yes

☐ No

16. If the main features of the enclosure(s) changed for the chimpanzees at your zoo between March 2019 and July 2020, please describe when and to what extent.

---

---

---

---

---

17. Were new animals added to enclosures near the chimpanzee enclosure(s) at your zoo between March 2019 and July 2020? \*

*Mark only one oval.*

☐ Yes

☐ No

18. If new animals were added to enclosures near the chimpanzee enclosure(s) at your zoo between March 2019 and July 2020, please describe when and to what extent.

---

---

---

---

---

19. Did chimpanzee keepers/caregivers wear masks or gloves before the pandemic? \*

*Mark only one oval.*

☐ Yes

☐ No

20. If chimpanzee keepers/caregivers wore masks or gloves before the pandemic, please describe when and to what extent.

---

---

---

---

---

21. Have chimpanzee keepers/caregivers been wearing masks or gloves during the pandemic? \*

*Mark only one oval.*

☐ Yes

☐ No

22. If chimpanzee keepers/caregivers have been wearing masks or gloves during the pandemic, please describe when and to what extent.

---

---

---

---

---

23. Did the frequency of positive reinforcement training change for the chimpanzees at your zoo between March 2019 and July 2020? \*

*Mark only one oval.*

☐ Yes

☐ No

24. If the frequency of positive reinforcement training changed for the chimpanzees at your zoo between March 2019 and July 2020, please describe when and to what extent.

---

---

---

---

---

25. Did your zoo close to visitors during a portion of the first wave of the pandemic (between March 2020 and July 2020)? \*

*Mark only one oval.*

☐ Yes

☐ No

26. If your zoo closed to visitors during a portion of the first wave of the pandemic (between March 2020 and July 2020), what date did your zoo close to visitors, and what date did your zoo re-open to visitors?

---

27. Please describe any additional changes to your zoo and/or with the chimpanzees at your zoo between March 2019 and July 2020. If there were changes, please also list approximate dates of those changes. If there were no changes, please write, "N/A". \*

---

---

---

---

---

28. The identity of all individuals participating in this research project will remain anonymous, as will the identity of zoos, for individual data analysis; however, I would like to acknowledge individuals and zoos for their participation, which may be included in my thesis proposal, thesis, professional journal, or presentations. \*

*Check all that apply.*

- ☐ Check this box, if you give me permission to acknowledge you, as described above.
- ☐ Check this box, if I have the permission of a manager to acknowledge your zoo, as described above.
- ☐ Check this box, if I do not have permission to acknowledge you or your zoo, as described above.

29. If I have the permission of a manager to acknowledge your zoo, as indicated in the previous question above, please provide the name, title, and contact information of that manager.

---

---

---

---

---

---

This content is neither created nor endorsed by Google.

**Google Forms**
