# Supplementary material for: Is Chimpanzee (Pan troglodytes) Wounding Frequency Affected by the Presence Versus Absence of Visitors? A Multi-Institutional Study
Source: MDPI journal article supplement (doi:10.3390/jzbg3030025), 2022-07-01
Supplement: s1 [file s1 › Date Parameters.pdf]

Supplement 3: Date and Wound Parameters.

| Date/Wound | Parameters                                                                                                                                                                                                                                                                                                                                                                                                                                                                                                                                                                                                                                                                                                                                                                                                                                                                                                                                                                                                                                                                                                                                                                                                                                                                                                                                                                                                                                                                                                                                                                                                                                                                                                                                                                                                                                                                 |
|------------|----------------------------------------------------------------------------------------------------------------------------------------------------------------------------------------------------------------------------------------------------------------------------------------------------------------------------------------------------------------------------------------------------------------------------------------------------------------------------------------------------------------------------------------------------------------------------------------------------------------------------------------------------------------------------------------------------------------------------------------------------------------------------------------------------------------------------------------------------------------------------------------------------------------------------------------------------------------------------------------------------------------------------------------------------------------------------------------------------------------------------------------------------------------------------------------------------------------------------------------------------------------------------------------------------------------------------------------------------------------------------------------------------------------------------------------------------------------------------------------------------------------------------------------------------------------------------------------------------------------------------------------------------------------------------------------------------------------------------------------------------------------------------------------------------------------------------------------------------------------------------|
|            | <p>1. Coder will log one wound category (0, 1, 2) per chimpanzee per day, and only for specified dates.</p> <p><i>Example:</i><br/>A report dated May 4, 2020 stated that Chimp 5 had two wounds in an altercation yesterday; however, May 3, 2020 was not a specified date for the study. Coder will not log these wounds.</p> <p>2. If the wound date can be determined, coder will log that date for the wound category. If the wound date cannot be determined, coder will log the date the wound is first reported.</p> <p><i>Examples:</i><br/>A report dated March 22, 2020 stated that Chimp 3 got some bites on Monday and Tuesday. Coder will log the wound category "2" for March 16, 2020 and March 17, 2020.</p> <p>A report dated April 28, 2020 stated that Chimp 4 was in a fight today and yesterday, and had a laceration to his hand. Coder will log the wound category "1" for 4/28/20.</p> <p>A report dated April 3, 2020 stated that the keeper saw two partially scabbed wounds on Chimp 3. Coder will log the wound category "2" for April 3, 2020.</p> <p>A report dated May 4, 2019 stated that Chimp 5 received two bites this week. Coder will log the wound category "2" for May 4, 2019.</p> <p>3. A wound might not be determined until a subsequent report date.</p> <p><i>Example:</i><br/>A report dated March 10, 2019 stated that Chimp 5 had a swollen toe yesterday. Updates on the swollen toe had been reported on subsequent reports. A report dated March 14, 2019 stated that the keeper was able to see a cut with pus on the underside of Chimp 5's swollen toe. Coder will log the wound category "1" for March 9, 2019.</p> <p>4. If a report stated that a chimpanzee sustained a wound that occurred on a previous date, and another wound that occurred on the date of the report, each wound is logged separately.</p> |

| Date/Wound                                     | Parameters                                                                                                                                                                                                                                                                                                                                                                                                                                                                                                                                                                                                                                                                                                                                                                                                                                                                                                                                                                                                                                                                                                                                                                                                                                                                                                                                          |
|------------------------------------------------|-----------------------------------------------------------------------------------------------------------------------------------------------------------------------------------------------------------------------------------------------------------------------------------------------------------------------------------------------------------------------------------------------------------------------------------------------------------------------------------------------------------------------------------------------------------------------------------------------------------------------------------------------------------------------------------------------------------------------------------------------------------------------------------------------------------------------------------------------------------------------------------------------------------------------------------------------------------------------------------------------------------------------------------------------------------------------------------------------------------------------------------------------------------------------------------------------------------------------------------------------------------------------------------------------------------------------------------------------------|
| <p>Date Parameters</p> <p><i>Continued</i></p> | <p><i>Example:</i></p> <p>A report dated February 27, 2020 stated that Chimp 7 was in a fight two days ago and had a laceration and a missing nail to his right pollex. The report also stated that Chimp 7 was in another fight today, and the keeper reported a scabbed laceration and a new fresh laceration to Chimp 7's right pollex. Coder will log the wound category "2" for February 25, 2020, and the wound category "1" for February 27, 2020.</p>                                                                                                                                                                                                                                                                                                                                                                                                                                                                                                                                                                                                                                                                                                                                                                                                                                                                                       |
|                                                | <p>1. Wounds will only be logged when written in the form of a noun, but not in the form of a verb.</p> <p><i>Examples:</i></p> <p>Chimp 2 was biting Chimp 3 will be logged as the wound category "0."</p> <p>Chimp 2 received a bite from Chimp 3 will be logged as the wound category "1."</p>                                                                                                                                                                                                                                                                                                                                                                                                                                                                                                                                                                                                                                                                                                                                                                                                                                                                                                                                                                                                                                                   |
| <p>Wound Parameters</p>                        | <p>2. Wounds will only be logged when the language about the wounds is definitive. Wounds will be coded as "0" when described as "may have gotten", "suspected", "is most likely", etc.</p> <p>3. Different wound names, such as bite, laceration, and cut will be considered different wounds, even if reported in different reports for the same day on the same body part for the same chimpanzee. Exception: A puncture and a bite will be considered the same wound if reported for the same day on the same body part for the same chimpanzee.</p> <p>4. If the word "wound" is in quotes and is reported as not much of a wound, it is still coded as a wound.</p> <p>5. Multiple wounds can have a single cause.</p> <p><i>Example:</i></p> <p>A report dated April 6, 2019 stated that Chimp 1 received a bite today to the top and bottom of his foot. Coder will log the wound category "2" for April 6, 2019.</p> <p>6. If there is more than one report of wounds for a particular chimpanzee for a particular date, coder will log the wound category based on all reports.</p> <p><i>Examples:</i></p> <p>A report dated May 5, 2020 stated that Chimp 6 received one wound today. A different report for the same date for the same chimpanzee listed a different wound. Coder will log the wound category "2" for May 5, 2020.</p> |

| Date/Wound                       | Parameters                                                                                                                                                                                                                                                                                                                                           |
|----------------------------------|------------------------------------------------------------------------------------------------------------------------------------------------------------------------------------------------------------------------------------------------------------------------------------------------------------------------------------------------------|
| Wound Parameters<br><i>Cont.</i> | <p>A report dated March 13, 2020 stated that Chimp 7 had received two wounds today. A different report for the same date for the same chimpanzee listed only one of the two wounds. Coder will log the wound category "2" for March 13, 2020.</p>                                                                                                    |
|                                  | <p>7. Wounds are logged, even when reported during a physical examination.</p>                                                                                                                                                                                                                                                                       |
|                                  | <p><i>Example:</i><br/>Chimp 6 was anesthetized for a physical. She had many wounds throughout her body, but were healing nicely.</p>                                                                                                                                                                                                                |
|                                  | <p>8. If wounds of two different chimpanzees are reported in the same sentence, determine the wound category for each chimpanzee.</p> <p><i>Example:</i><br/>A report dated April 25, 2019 stated that Chimp 1 and Chimp 4 received some bites and cuts today. Coder will log the wound category "2" for Chimp 1 and Chimp 4 for April 25, 2019.</p> |
